# Supplementary material for: The epidemiology of malpractice claims in primary care: a systematic review
Source: HighWire-hosted journal article supplement (doi:10.1136/bmjopen-2013-002929), 2013-06-01
Supplement: bmjopen-2013-002929supp_appendix.pdf [file bmjopen-2013-002929supp_appendix.pdf]

## **Appendix 1: Search strategy**

The electronic databases were searched using a combination of the following keywords and search terms: "Judicial Role", "Compensation and Redress", "Liability, "Malpractice", "Drug Toxicity", "Medical Errors", "Accident Prevention" combined with "General Practice", "General Practitioners", "Ambulatory Care Facilities", "Outpatient Clinics, Hospital", "Physicians, Primary Care", "Physicians, Family", "Ambulatory Care", "Primary Health Care".

The electronic search was supplemented by hand searching references of retrieved articles and the publications of the Medical Defence Union (MDU), Medical Protection Society (MPS), Medical and Dental Defence Union of Scotland (MDDUS), Controlled Risk Insurance Company (CRICO), the Doctor's Company (US) and the Canadian Medical Protective Association (CMPA).

Websites of multiple patient safety organizations were also accessed as follows. In Australia; The Australian Commission on Safety and Quality in Healthcare and the Institute of Health and Welfare, in the UK; the Agency for Healthcare Research and Quality, the National Patient Safety Foundation, the King's Patient Safety, the Service Quality Research Centre and the National Patient Safety Agency and in the US; the Institute of Medicine, Veterans Association National Center for Patient Safety, National Patient Safety Foundation and the Agency for Healthcare Research and Quality.
